# Supplementary material for: A NiCu–MoS2 electrocatalyst for pH-universal hydrogen evolution reaction and Zn–air batteries driven self-power water splitting
Source: Royal Society of Chemistry journal article supplement (doi:10.1039/d3ta02668j), 2023-01-01
Supplement: d3ta02668j1.pdf [file d3ta02668j1.pdf]

## SUPPORTING INFORMATION

### A NiCu-MoS<sub>2</sub> electrocatalyst for pH-universal hydrogen evolution reaction and Zn-air batteries driven self-power water splitting

Mukesh Kumar and Tharamani C. Nagaiah\*

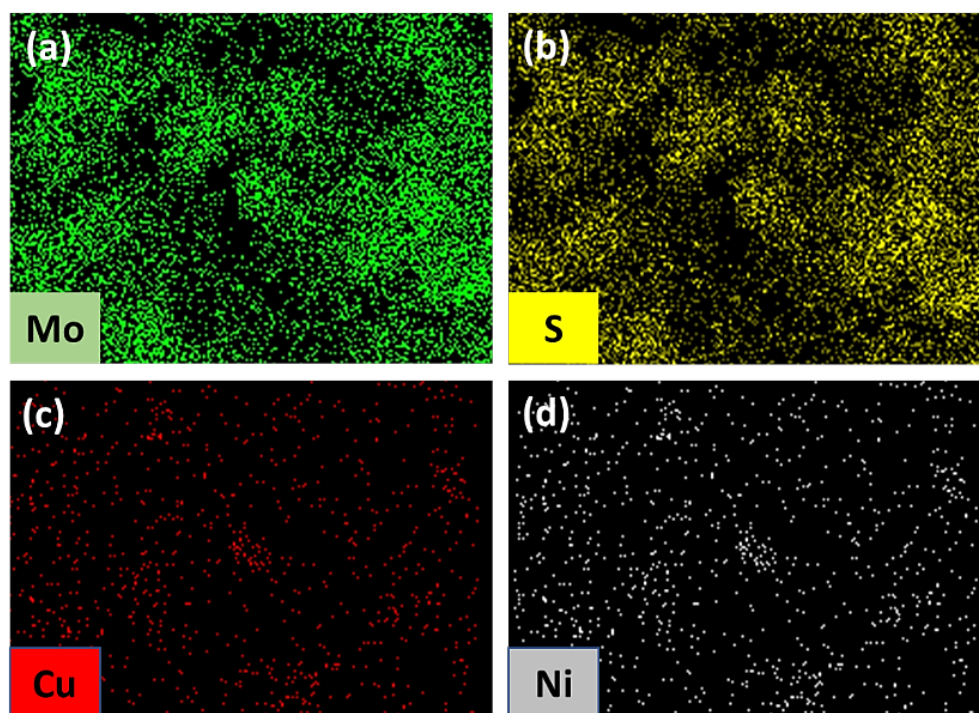

**Fig. S1.** (a) Elemental dot mapping images representing the distribution of (a) Mo, (b) S, (c) Cu and (d) Ni of NiCu-MoS<sub>2</sub>.

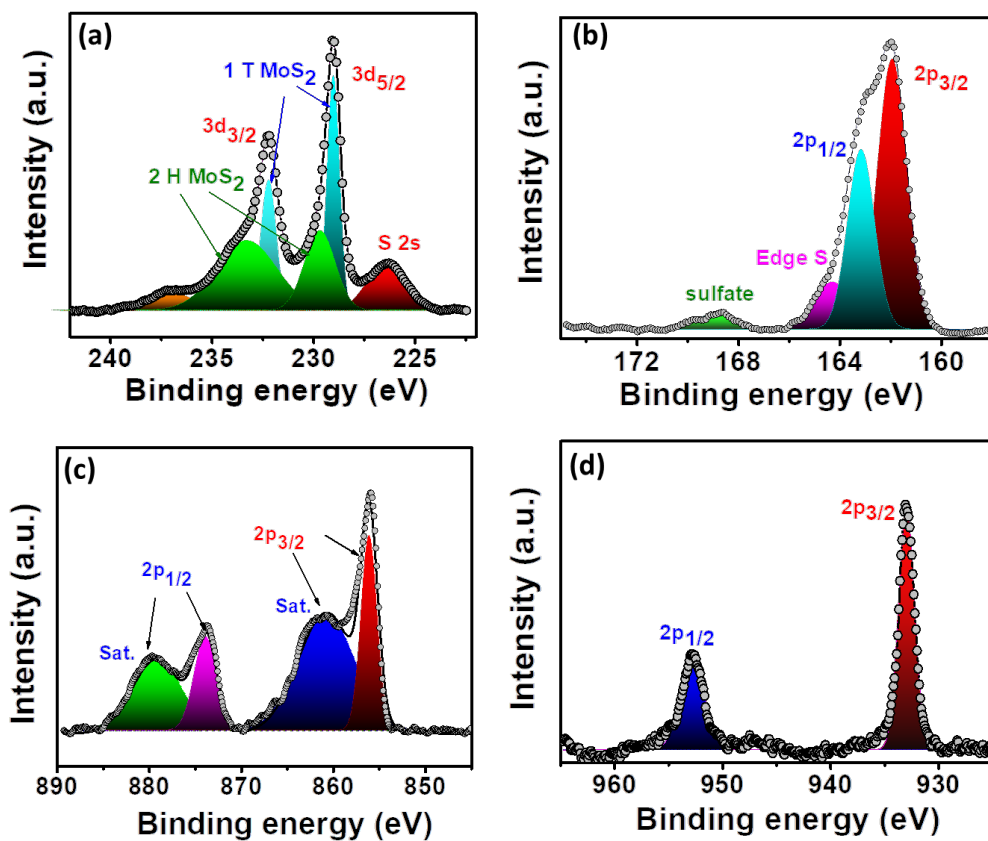

**Fig. S2.** Deconvoluted XPS spectra of (a) Mo 3d, (b) S 2p, (c) Ni 2p, and (d) Cu 2p of NiCu–MoS<sub>2</sub>.

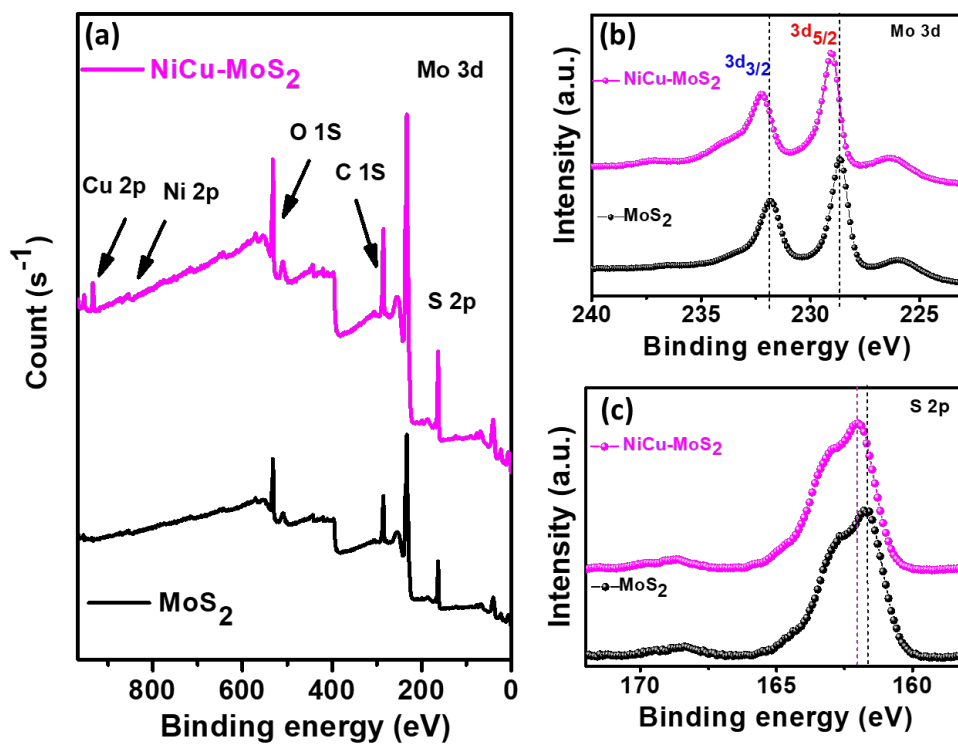

**Fig. S3.** (a) Comparative XPS survey spectra and XPS spectra of (b) Mo 3d and (c) S 2p of MoS<sub>2</sub> and NiCu–MoS<sub>2</sub>.

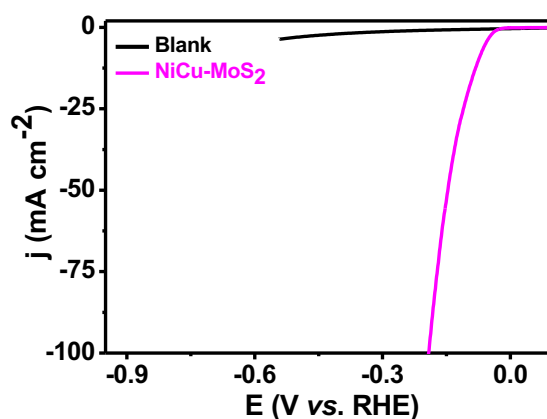

**Fig. S4.** Linear sweep voltammograms demonstrating HER activity of bare glassy carbon electrode and NiCu-MoS<sub>2</sub> coated glassy carbon electrode in 0.5 M H<sub>2</sub>SO<sub>4</sub> electrolyte at a scan rate of 5 mV s<sup>-1</sup>.

#### **Electrochemical surface area (ECSA):**

For the better comparison of the electrocatalytic performance of the various catalysts the determination of the no. of electrochemically active sites is quite beneficial. To determine the no. of electrochemically active sites we have calculated the ECSA. For the ECSA calculation the double-layer capacitance ( $C_{dl}$ ) was an accepted effective criterion. The  $ECSA = C_{dl}/C_s$  (where  $C_s$  denoted specific capacitance and was 20-60  $\mu\text{F cm}^{-2}$  in 0.5 M H<sub>2</sub>SO<sub>4</sub>). In present study the value is selected as 40  $\mu\text{F cm}^{-2}$ . To calculate the double layer capacitance CVs were recorded for the various catalysts in the non-faradaic region from 0.00 to 0.05 V vs. RHE at various scan rates ranging from 25-300 mV s<sup>-1</sup>. The double layer capacitance is calculated by plotting the average current density ( $(I_a+I_c)/2$ ) vs. scan rates. <sup>1</sup> After putting these values in above equations the ECSA was obtained. The  $C_{dl}$  value obtained for the NiCu-MoS<sub>2</sub> is 376.2  $\mu\text{F}$ , which is divided by 40  $\mu\text{F cm}^{-2}$  to obtained the ECSA. The ECSA shows that the for NiCu-MoS<sub>2</sub> is 9.4 cm<sup>2</sup>, higher than all other catalysts showing more active sites are available for the electrochemical reaction.

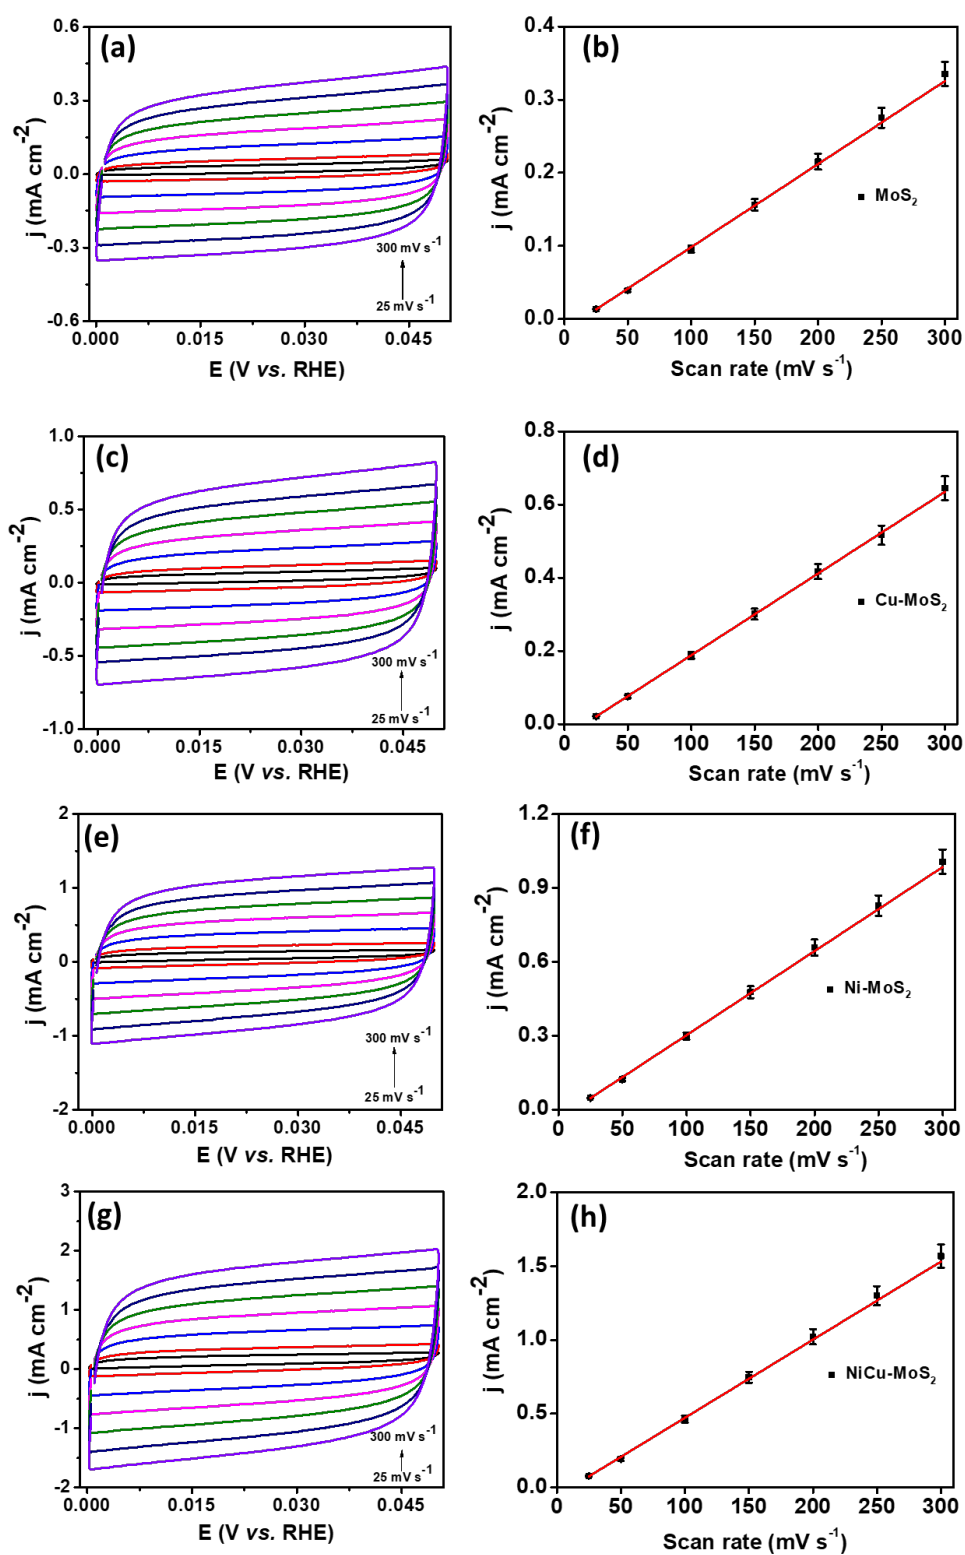

**Fig. S5.** Cyclic voltammograms of (a) MoS<sub>2</sub>, (c) Cu-MoS<sub>2</sub>, (e) Ni-MoS<sub>2</sub>, (g) NiCu-MoS<sub>2</sub> at various scan rates in the non-faradaic potential region and (b), (d), (f), (h), are corresponding average current versus scan rates plot in 0.5 M H<sub>2</sub>SO<sub>4</sub>, CE: graphite, RE: Ag/AgCl/3 M KCl.

**Table S1:** Electrochemical surface area (ECSA determination):

| Catalysts              | $C_{dl}$ ( $\mu\text{F}$ ) at 0.025 V vs. RHE | ECSA ( $\text{cm}^2$ ) |
|------------------------|-----------------------------------------------|------------------------|
| MoS <sub>2</sub>       | 83.6                                          | 2.09                   |
| Cu-MoS <sub>2</sub>    | 157.6                                         | 3.94                   |
| Ni-MoS <sub>2</sub>    | 241.2                                         | 6.033                  |
| NiCu- MoS <sub>2</sub> | 376.2                                         | 9.4                    |

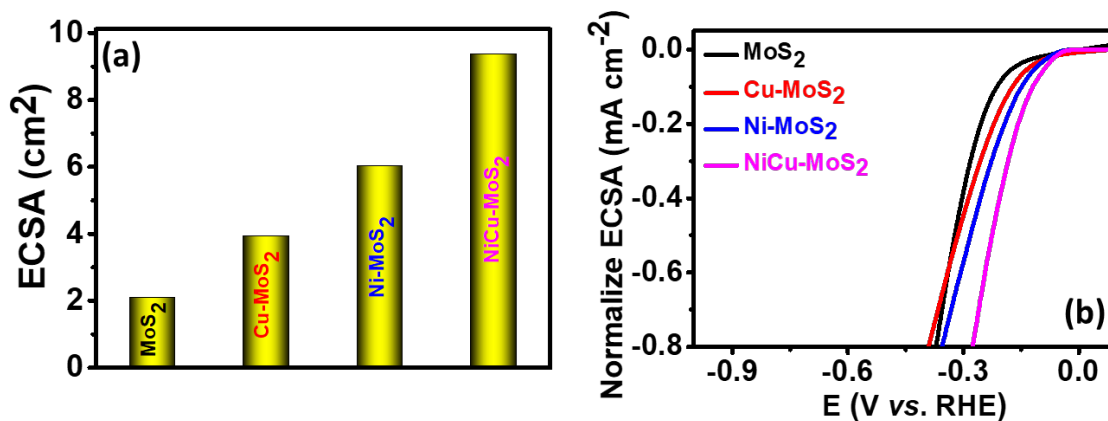

**Fig. S6.** (a) Bar diagram representing the ECSA of the various catalysts, (b) polarisation curves Normalized with ECSA for various catalysts in 0.5 M H<sub>2</sub>SO<sub>4</sub>.

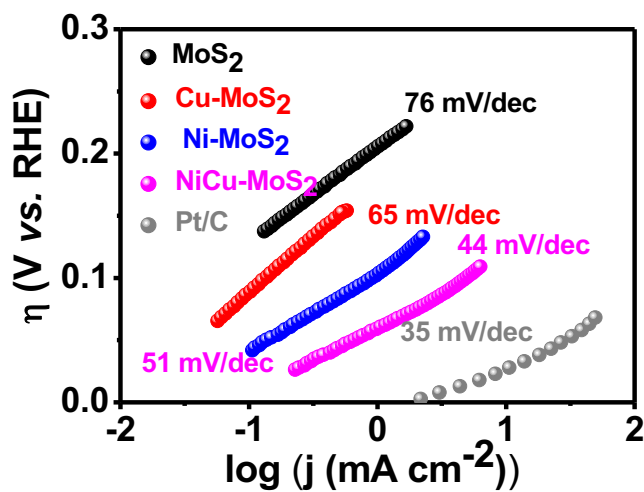

**Fig. S7.** Tafel plots for various catalysts extracted from Fig. 2a (main manuscript) in 0.5 M H<sub>2</sub>SO<sub>4</sub> electrolyte, CE: graphite, RE: Ag/AgCl/3 M KCl.

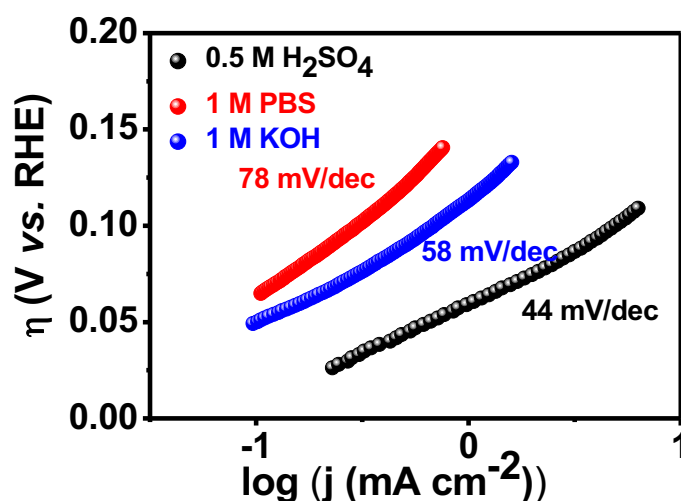

**Fig. S8.** Tafel plots for NiCu-MoS<sub>2</sub> catalysts in different electrolytes extracted from Fig. 2.

The turnover frequencies (TOFs) for OER and HER were calculated using following equations:

$$\text{TOF (for HER)} = jA/2Fn$$

$$\text{TOF (for OER)} = jA/4Fn$$

wherein  $j$  is the current density ( $\text{mA cm}^{-2}$ ),  $A$  is the area of the electrode ( $\text{cm}^2$ ),  $n$  is the no. of moles of the active catalyst;  $F$  is the Faraday constant ( $96\,485.3\text{ C mol}^{-1}$ ), the number 4 refers to four-electron transfer in the OER process, whereas the number 2 refers to two-electron transfer in the HER process.

**Table S2:** TOFs of various catalysts for HER @ 150 mV of overpotential in different electrolytes:

| Catalysts              | 0.5 M H <sub>2</sub> SO <sub>4</sub> | 1 M KOH | 1 M PBS |
|------------------------|--------------------------------------|---------|---------|
| MoS <sub>2</sub>       | 0.007                                | 0.0056  | 0.002   |
| Cu-MoS <sub>2</sub>    | 0.023                                | 0.0153  | 0.0045  |
| Ni-MoS <sub>2</sub>    | 0.05                                 | 0.0375  | 0.01825 |
| NiCu- MoS <sub>2</sub> | 0.14                                 | 0.16    | 0.056   |

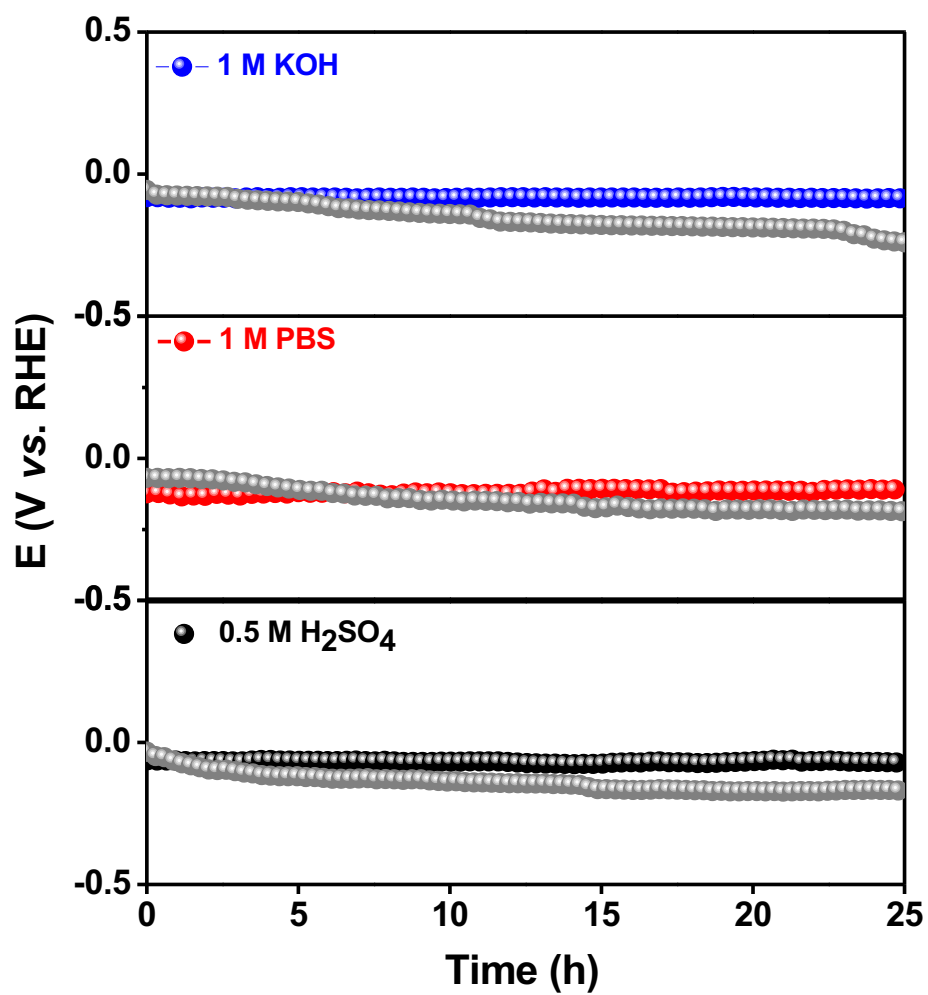

**Fig. S9.** Chronopotentiometry curve showing cycling stability at  $-10 \text{ mA cm}^{-2}$  for NiCu-MoS<sub>2</sub> and Pt/C in various electrolytes.

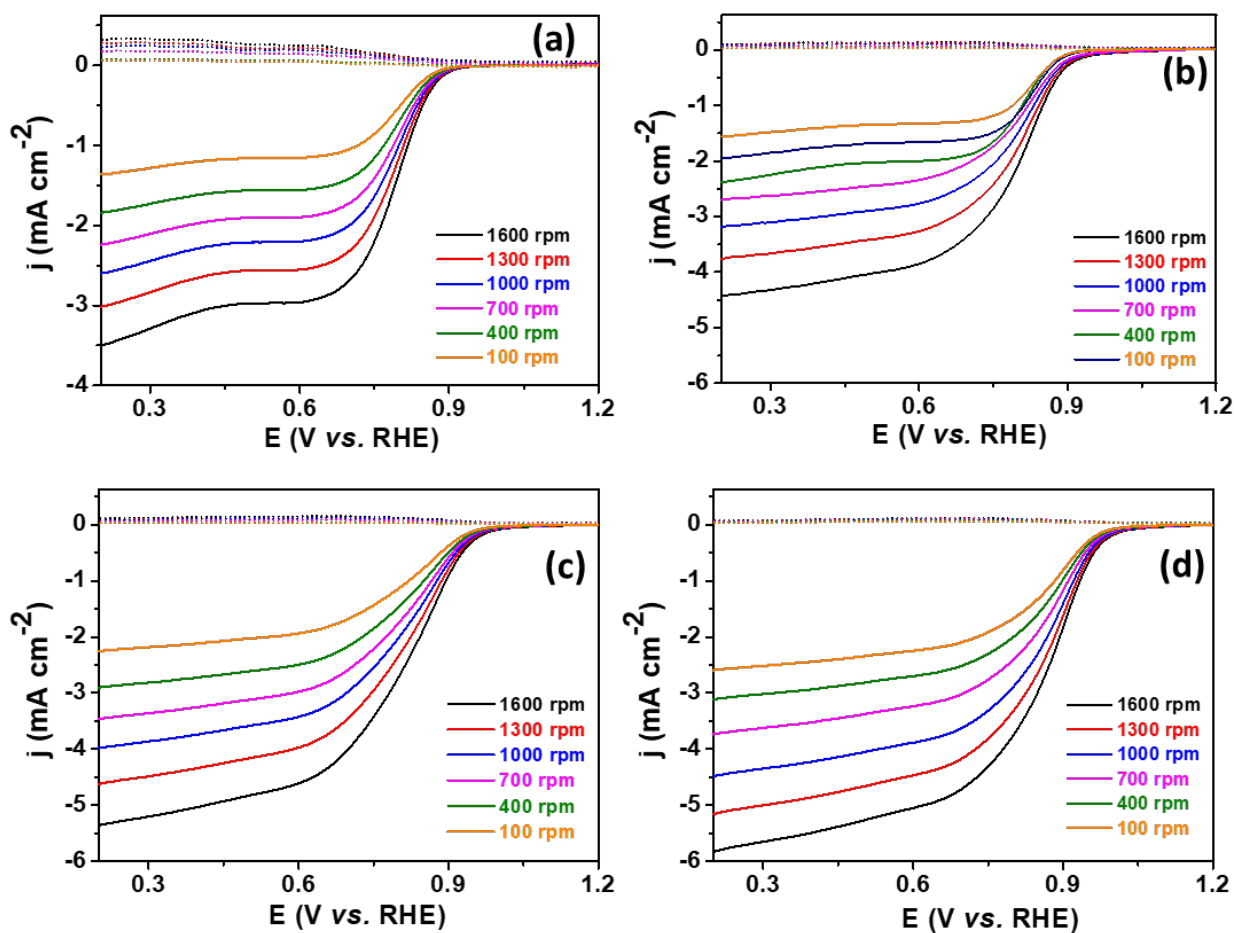

**Fig. S10.** RRDE Linear polarization curves for (a) MoS<sub>2</sub>, (b) Cu-MoS<sub>2</sub>, (c) Ni-MoS<sub>2</sub>, and (d) NiCu-MoS<sub>2</sub> at varying rotation rates in 0.1 M KOH at a scan rate of 5 mV s<sup>-1</sup> CE: Pt-wire; RE: Hg/HgO/1 M NaOH.



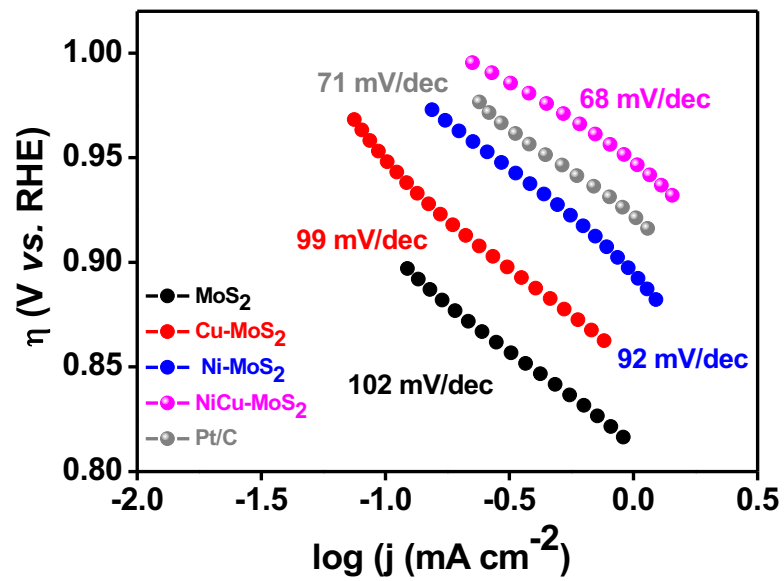

**Fig. S11.** Tafel plots for various catalysts extracted from Fig. 3b (main manuscript) in 0.1 M KOH electrolyte for ORR, CE: graphite, RE: Hg/HgO/1 M NaOH.

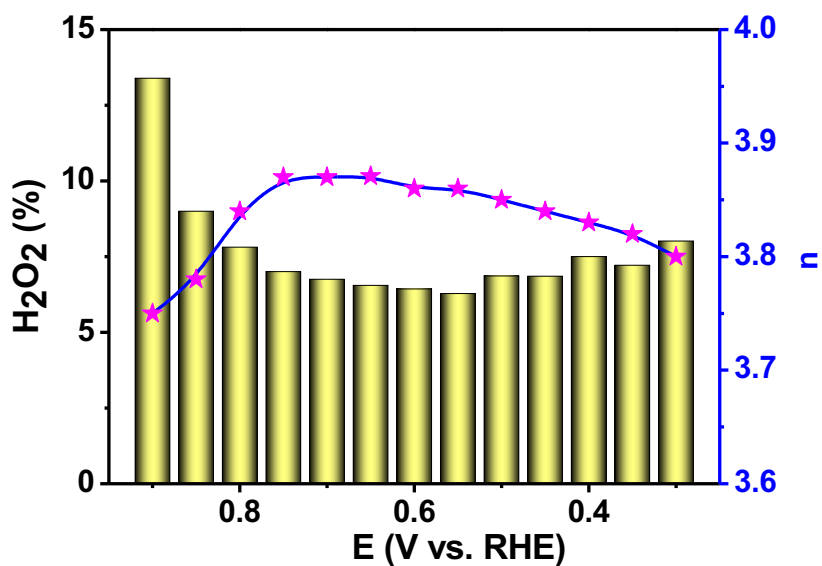

**Fig. S12.** Bar diagram representing the no. of electron and % of H<sub>2</sub>O<sub>2</sub> at various potentials at 1600 rpm.

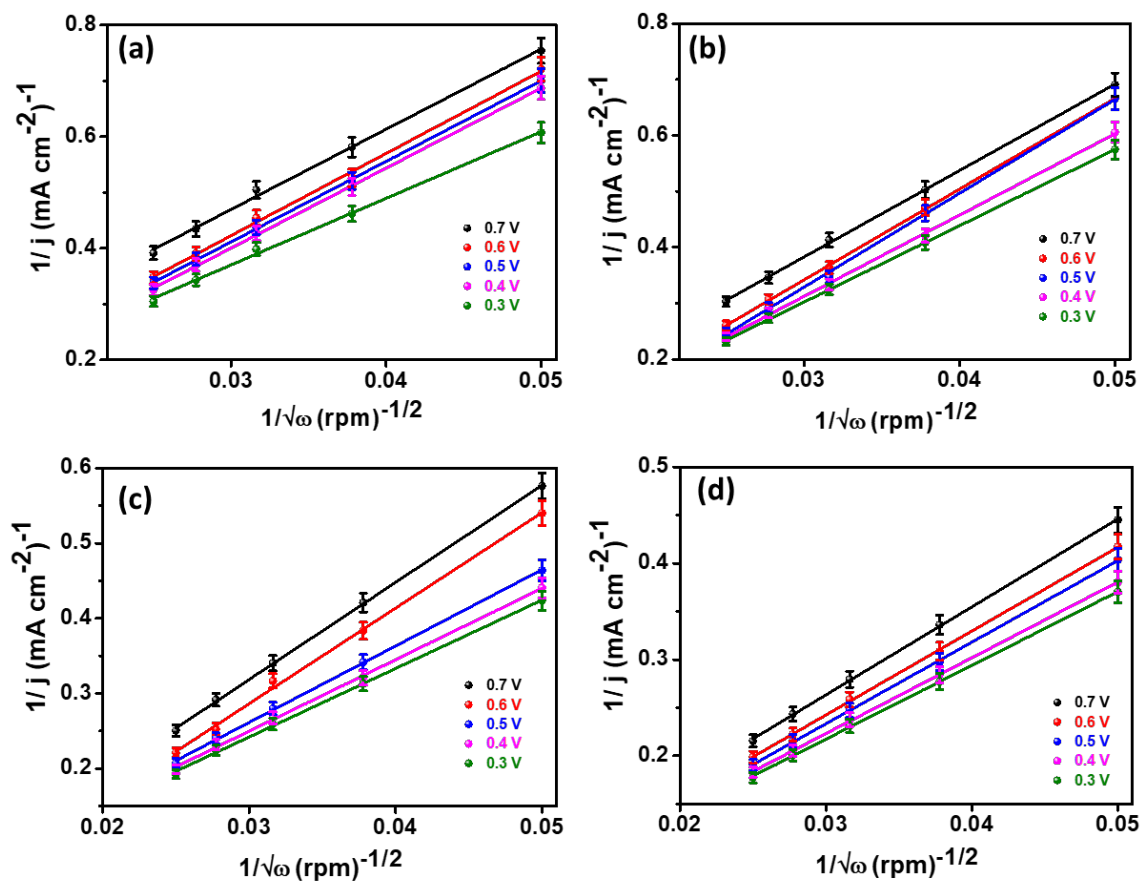

**Fig. S13.** Koutecky-Levich (K-L) plot for (a) MoS<sub>2</sub>, (b) Cu-MoS<sub>2</sub>, (c) Ni-MoS<sub>2</sub>, and (d) NiCu-MoS<sub>2</sub> at various potential extracted from the linear polarisation curve at various rotation rates in 0.1 M KOH at a scan rate of 5 mV s<sup>-1</sup>. CE: Pt-wire; RE: Hg/HgO/1 M NaOH.

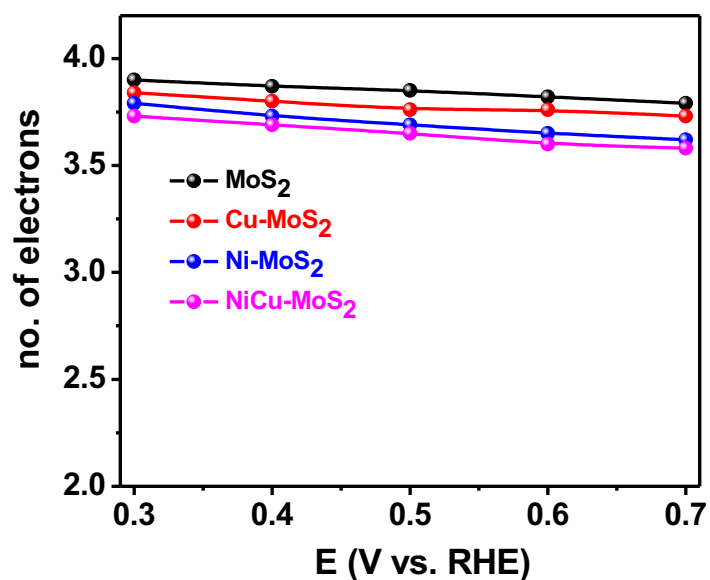

**Fig. S14.** Potential dependent number of electron extracted from RDE plot in 0.1 M KOH at a scan rate of 5 mV s<sup>-1</sup>. CE: graphite; RE: Hg/HgO/1 M NaOH.

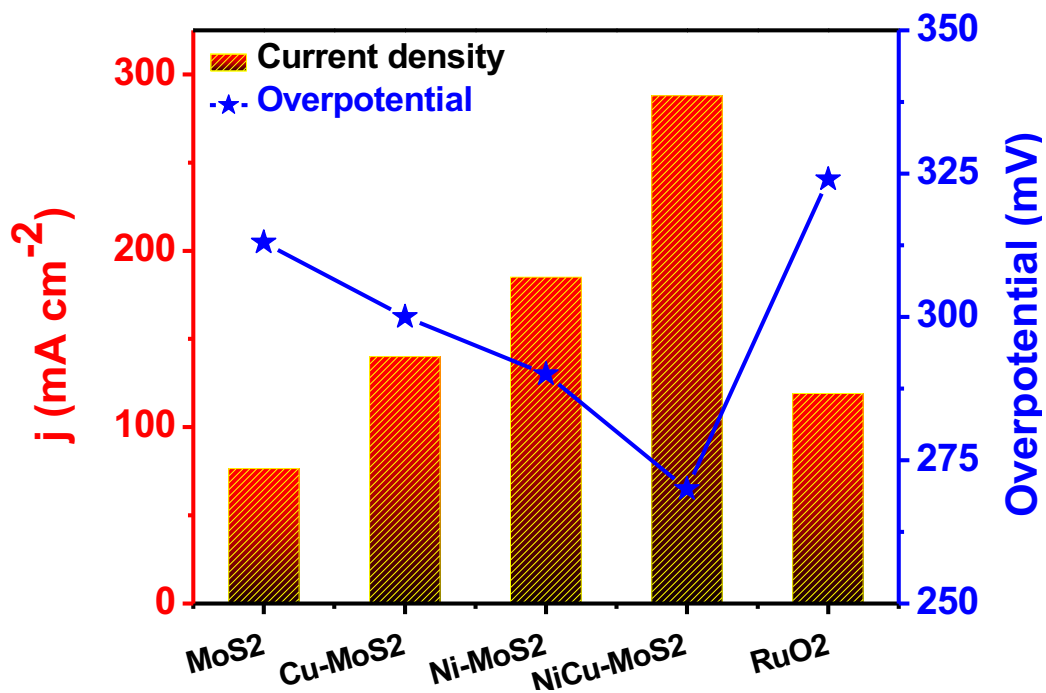

**Fig. S15.** (a) Bar diagram showing the comparison of obtained current density @ 1.73 V and overpotential @ 10 mA cm<sup>-2</sup> for various catalysts.

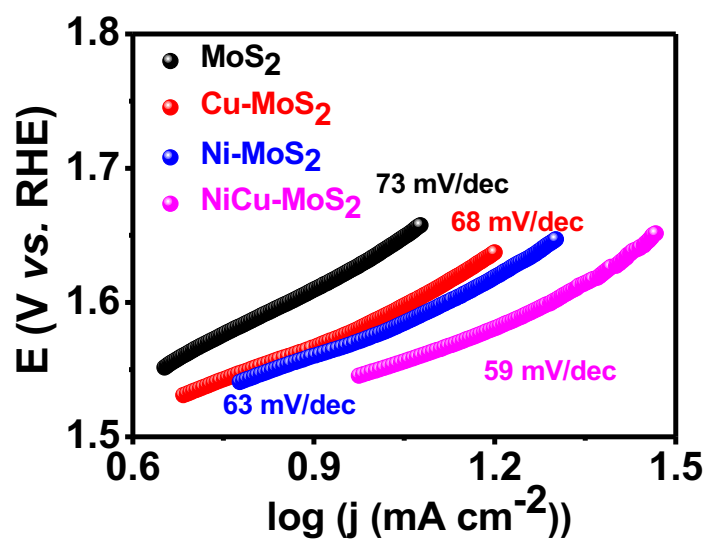

**Fig. S16.** Tafel plots for various catalysts extracted from Fig. 4a (main manuscript) in 1 M KOH electrolyte for OER, CE: graphite rod, RE: Hg/HgO/1 M NaOH.

**Table S3:** TOFs of various catalysts for OER @ 1.65 V vs. RHE in 1 M KOH electrolyte:

| Catalysts              | 1 M KOH |
|------------------------|---------|
| MoS <sub>2</sub>       | 0.05    |
| Cu-MoS <sub>2</sub>    | 0.093   |
| Ni-MoS <sub>2</sub>    | 0.121   |
| NiCu- MoS <sub>2</sub> | 0.21    |

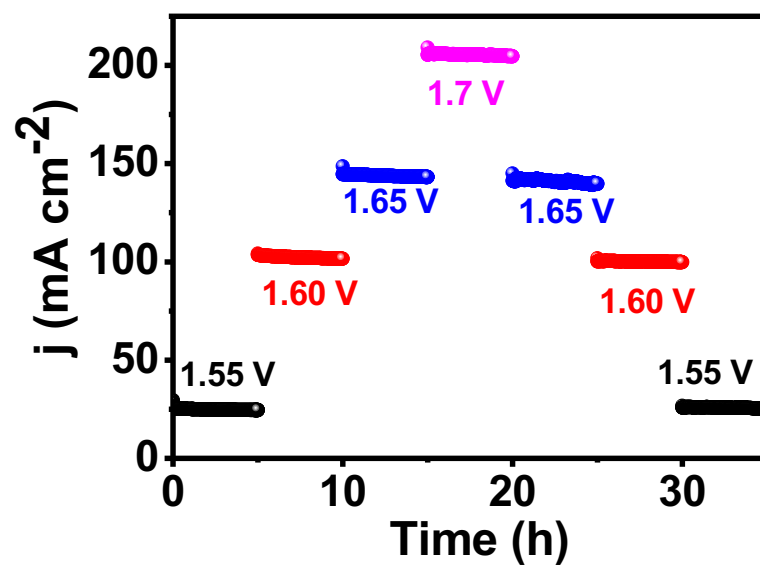

**Fig. S17.** The multistep chronoamperometric curve for OER by sweeping the potential from 1.55 V to 1.7 V.

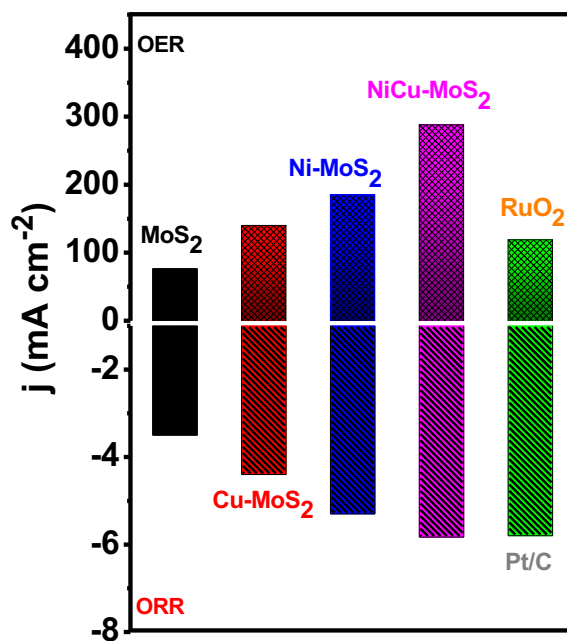

**Fig. S18.** Bar diagram representing the highest current density of the OER and diffusion limited current density of the ORR.

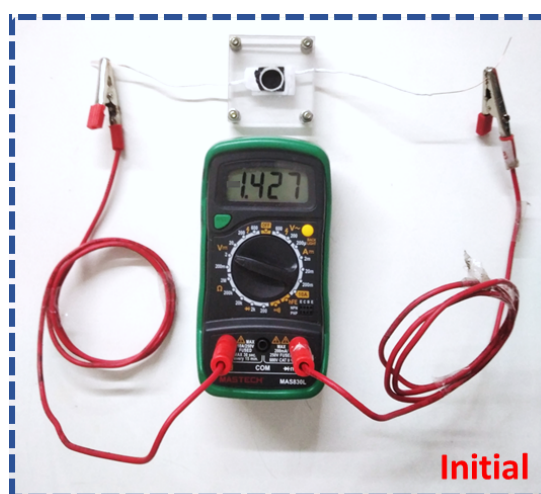

**Fig. S19.** Photographic image of the OCV recorded for the battery assembled with NiCu-MoS<sub>2</sub> air cathode.

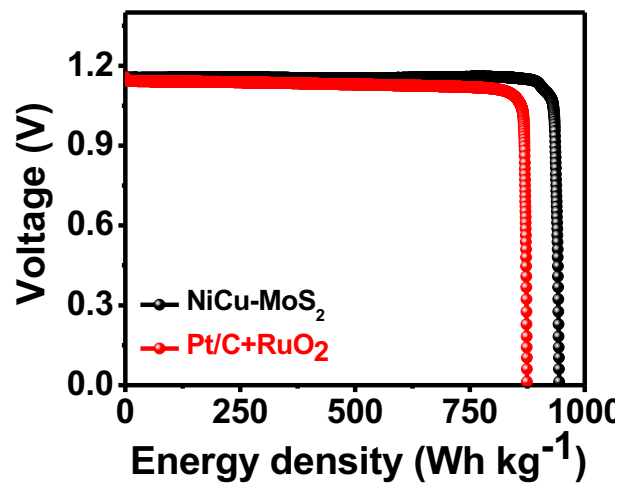

**Fig. S20.** Energy density of the Zn-air battery assembled with NiCu-MoS<sub>2</sub> and Pt/C+RuO<sub>2</sub> air cathode.

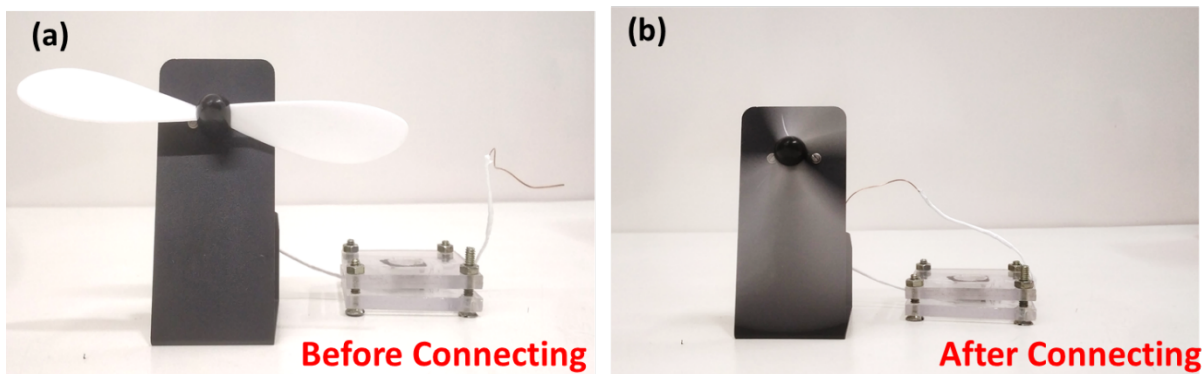

**Fig. S21.** Photographic images of the fan powered by a single Zn air battery assembled with NiCu-MoS<sub>2</sub> based air cathode.

**Round trip efficiency (%) = Discharge voltage/ Charge voltage**

**For the first cycle,**

$$\begin{aligned}
 \text{Round trip efficiency (\%)} &= \text{Discharge voltage/ Charge voltage} \\
 &= 1.16/1.84 \\
 &= 63 \%
 \end{aligned}$$

For the 400<sup>th</sup> cycle,

Round trip efficiency (%) =  $1.127/1.854$

= 61 %

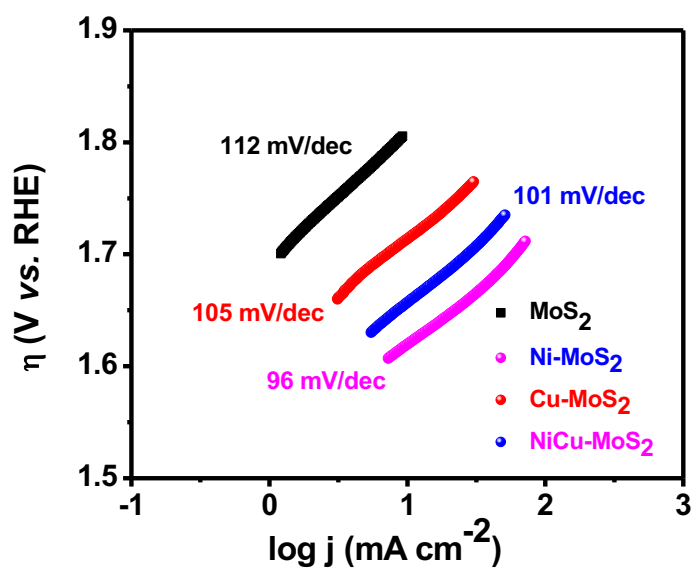

**Fig. S22.** Tafel plots for various catalysts extracted from Fig. 6a (main manuscript) in 1 M KOH for overall water electrolysis.

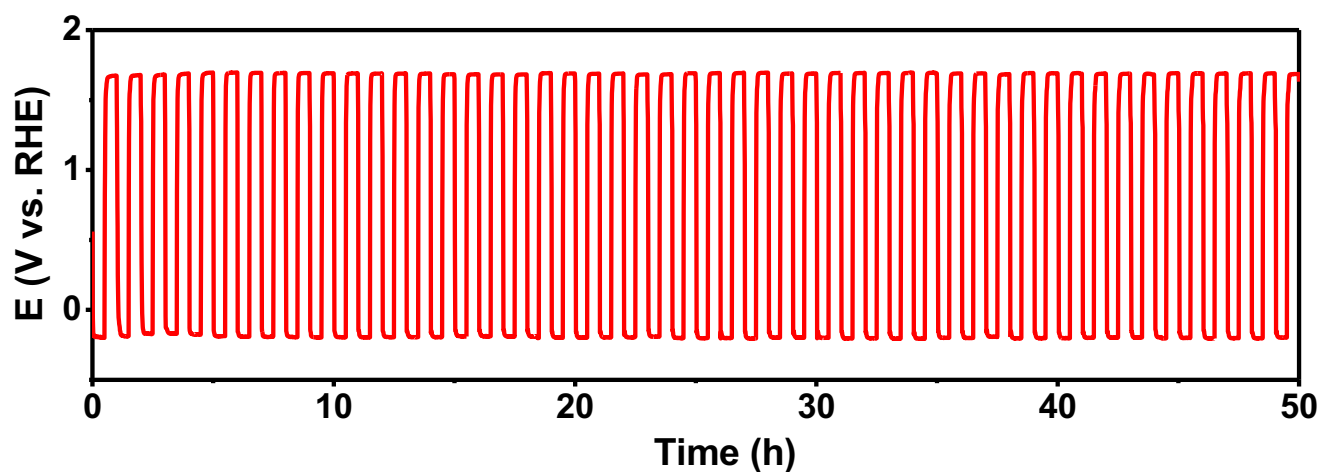

**Fig. S23 (a)** Chronopotentiometric curve of water splitting device recorded at  $100 \text{ mA cm}^{-2}$  for OER and  $-100 \text{ mA cm}^{-2}$  for HER in the three-electrode system where the polarity of a device was reversed after 30 minutes.



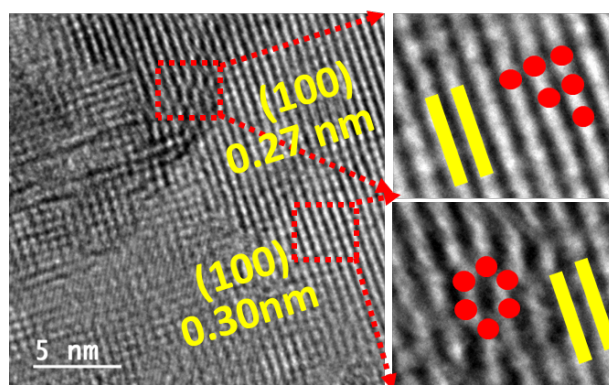

**Fig. S24** HR-TEM of NiCu-MoS<sub>2</sub> after HER stability, enlargement shows the 1T phase structure region and its corresponding triangular prismatic structure and 2H phase structure region and its corresponding octahedral structure of NiCu-MoS<sub>2</sub>.

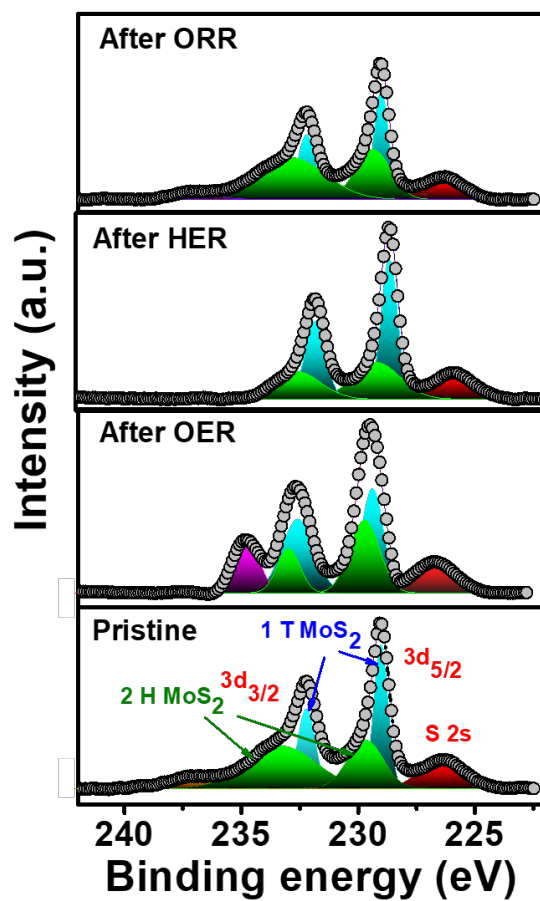

Fig. S25 Deconvoluted XPS spectra of Mo 3d before and after the stability study.

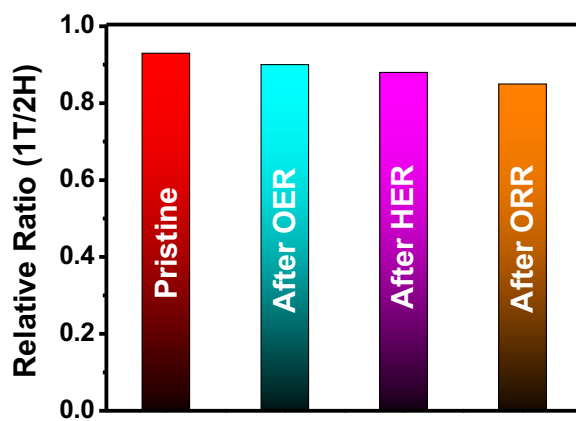

Fig. S26 Relative ratio of 1T/2H phase of NiCu-MoS<sub>2</sub> before and after the stability study.

**Table S4:** Literature reports showing the self powered water splitting with Zn air batteries:

| Catalyst                                                  | $\eta$ @10 mA cm <sup>-2</sup> in 1.0 M KOH (V) |                                                                              | E <sub>1/2</sub> ORR (V) | $\Delta E$ (V) | $\Delta E$ cell (V) | pH universal HER activity | Zn-Air battery                       |                                          | Ref |
|-----------------------------------------------------------|-------------------------------------------------|------------------------------------------------------------------------------|--------------------------|----------------|---------------------|---------------------------|--------------------------------------|------------------------------------------|-----|
|                                                           | OER                                             | HER                                                                          |                          |                |                     |                           | Power density (mW cm <sup>-2</sup> ) | Specific capacity (mAh g <sup>-1</sup> ) |     |
| NiFe/NCNF/CC                                              | 0.26                                            |                                                                              | 0.79                     | 0.70           | 2.05                | No                        | 141                                  | 640                                      | 2   |
| CoSA + Co <sub>9</sub> S <sub>8</sub> / HCNT              | 0.33                                            | 0.25                                                                         | 0.85                     | 0.75           | 1.59                | No                        | 177                                  | 788                                      | 3   |
| CoSA/N,S-HCS                                              | 0.31                                            | 0.17                                                                         | 0.85                     | 0.67           | 1.64                | No                        | 173                                  | 781                                      | 4   |
| NiS <sub>2</sub> /CoS <sub>2</sub> -O NWs                 | 0.24                                            | 0.18                                                                         | 0.70                     |                | 1.77                | No                        |                                      |                                          | 5   |
| CoN <sub>x</sub> /NGA                                     | 0.3                                             | 198                                                                          | 0.83                     | 0.70           | 1.71                | No                        |                                      | 638                                      | 6   |
| CoO <sub>x</sub> @NOC                                     | 0.32                                            | 0.25                                                                         | 0.86                     | 0.69           | 1.51                | No                        | 141.65                               | 757                                      | 7   |
| RuCo/NPC                                                  | 0.35                                            | 0.21                                                                         | 0.80                     | 0.79           | 1.68                | No                        | 79.4                                 | 1089                                     | 8   |
| CoFe@NO -CNT                                              | 0.16                                            | 0.13                                                                         | 0.84                     | 0.73           | 1.57                | No                        | 142                                  | 819                                      | 9   |
| N, Co-CNTs                                                | 0.30                                            | 0.20                                                                         | 0.85                     |                | 1.69                | No                        | 114                                  |                                          | 10  |
| CoP@PNC-Do                                                | 0.32                                            | 0.17 (1 M KOH)<br>0.16 (0.5M H <sub>2</sub> SO <sub>4</sub> )                | 0.80                     |                | 1.74                |                           | 138                                  | 730                                      | 11  |
| Ni <sub>1.9</sub> FeS <sub>1.09</sub> (OH) <sub>4.6</sub> | 0.20                                            | 0.28@ 80 mA cm <sup>-2</sup>                                                 |                          |                | 1.62                | No                        | 248                                  |                                          | 12  |
| Pt/NBF-ReS <sub>2</sub> /Mo <sub>2</sub> CTx              | 0.334 (0.1 M KOH)                               | 0.037 1 M KOH<br>0.049 1 M PBS<br>0.029 0.5 M H <sub>2</sub> SO <sub>4</sub> | 0.911                    | 0.653          |                     | yes                       | 180.2                                | 786                                      | 13  |
| Cu-N-SC-1100                                              | 0.33                                            | 0.17                                                                         | 0.89                     | 0.67           | 1.68                | No                        | 198                                  | 732                                      | 14  |
| C <sub>60</sub> -SWCNT                                    | 0.46                                            | 0.38 (0.1 KOH)<br>0.33(PBS)<br>0.32 (0.5 M H <sub>2</sub> SO <sub>4</sub> )  | 0.79                     | 0.77           | 1.68                | yes                       | NA                                   | NA                                       | 15  |
| CoFe(3:1)S <sub>2</sub>                                   | 0.25                                            | 0.117 1 M KOH<br>0.12                                                        | 0.87                     | 0.61           | 1.58                | Yes                       | 387                                  | 841                                      | 16  |

|                       |       |                                                                                          |       |      |       |     |     |     |              |
|-----------------------|-------|------------------------------------------------------------------------------------------|-------|------|-------|-----|-----|-----|--------------|
|                       |       | 1 M PBS<br>0.98<br>0.5 M<br>H <sub>2</sub> SO <sub>4</sub>                               |       |      |       |     |     |     |              |
| NiCu-MoS <sub>2</sub> | 0.290 | 0.081<br>1 M KOH<br>0.088<br>1 M PBS<br>0.076<br>0.5 M<br>H <sub>2</sub> SO <sub>4</sub> | 0.856 | 0.66 | 1.622 | Yes | 283 | 813 | This<br>Work |

## References:

1. N. Thakur, M. Kumar, S. D. Adhikary, D. Mandal and T. C. Nagaiah, *Chem. Commun.*, 2019, **55**, 5021-5024.
2. C. Lai, J. Fang, X. Liu, M. Gong, T. Zhao, T. Shen, K. Wang, K. Jiang and D. Wang, *Appl. Catal. B: Environ.*, 2021, **285**, 119856.
3. Y. Li, R. Cao, L. Li, X. Tang, T. Chu, B. Huang, K. Yuan and Y. Chen, *Small*, 2020, **16**, 1906735.
4. Z. Zhang, X. Zhao, S. Xi, L. Zhang, Z. Chen, Z. Zeng, M. Huang, H. Yang, B. Liu and S. J. Pennycook, *Adv. Energy Mater.*, 2020, **10**, 2002896.
5. J. Yin, Y. Li, F. Lv, M. Lu, K. Sun, W. Wang, L. Wang, F. Cheng, Y. Li and P. Xi, *Adv. Mat.*, 2017, **29**, 1704681.
6. H. Zou, G. Li, L. Duan, Z. Kou and J. Wang, *Appl. Catal. B: Environ.*, 2019, **259**, 118100.
7. M. E. Hilal, H. A. Younus, S. Chaemchuen, S. Dekyvere, X. Zen, D. He, J. Park, T. Han and F. Verpoort, *Catal. Sci. Technol.*, 2021.
8. Y. Pei, W. He, M. Wang, J. Wang, T. Sun, L. Hu, J. Zhu, Y. Tan and J. Wang, *Chem. Commun.*, 2021, **57**, 1498-1501.
9. M. Li, S. Chen, B. Li, Y. Huang, X. Lv, P. Sun, L. Fang and X. Sun, *Electrochim. Acta*, 2021, **388**, 138587.
10. Q. Jin, B. Ren, H. Cui and C. Wang, *Appl. Catal. B: Environ.*, 2021, **283**, 119643.
11. Y. Li, Y. Liu, Q. Qian, G. Wang and G. Zhang, *Energy Storage Mater.*, 2020, **28**, 27-36.
12. B. Wang, C. Tang, H. F. Wang, B. Q. Li, X. Cui and Q. Zhang, *Small Methods*, 2018, **2**, 1800055.
13. M. Yi, N. Li, B. Lu, L. Li, Z. Zhu and J. Zhang, *Energy Storage Mater.*, 2021, **42**, 418-429.
14. M. Wang, K. Su, M. Zhang, X. Du and Z. Li, *ACS Sustain. Chem. Eng.*, 2021.
15. R. Gao, Q. Dai, F. Du, D. Yan and L. J. J. o. t. A. C. S. Dai, 2019, **141**, 11658-11666.
16. M. Kumar and T. C. Nagaiah, *J. Mater. Chem. A*, 2022, **10**, 4720-4730.
